# Supplementary material for: Photocatalytic degradation of PET microfibers and hydrogen evolution by Ni5P4/TiO2/C NFs
Source: Royal Society of Chemistry journal article supplement (doi:10.1039/d3cy00815k), 2023-01-01
Supplement: d3cy00815k1.pdf [file d3cy00815k1.pdf]

## Supplementary Information

### Photocatalytic degradation of PET microfibers and hydrogen evolution by the $\text{Ni}_5\text{P}_4/\text{TiO}_2/\text{C}$ NFs

Guixiang Peng<sup>a</sup>, Xueyang Qi<sup>a</sup>, Wenbin Qu<sup>a</sup>, Xiaoli Shao<sup>b</sup>, Lixin Song<sup>a, \*</sup>, Pingfan Du<sup>a</sup>, Jie Xiong<sup>a, c, \*</sup>

<sup>a</sup> College of Textile Science and Engineering, Zhejiang Sci-Tech University, Hangzhou 310018, China.

<sup>b</sup> China Certification & Inspection Group Ningbo Co., Ltd., No.32, Lane 299, Guanghua Road, Ningbo, Zhejiang, 315048, China.

<sup>c</sup> School of Fashion Design & Engineering, Zhejiang Sci-Tech University, Hangzhou 311199, Zhejiang, China

\* Corresponding Authors: [lxsong12@zstu.edu.cn](mailto:lxsong12@zstu.edu.cn) (LX Song) and [jxiong@zstu.edu.cn](mailto:jxiong@zstu.edu.cn) (J Xiong)

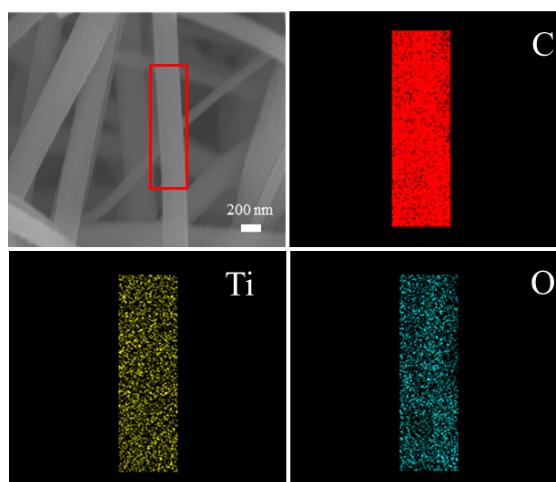

Fig. S1 The corresponding element mapping of the marked area in  $\text{TiO}_2/\text{C}$  NFs.

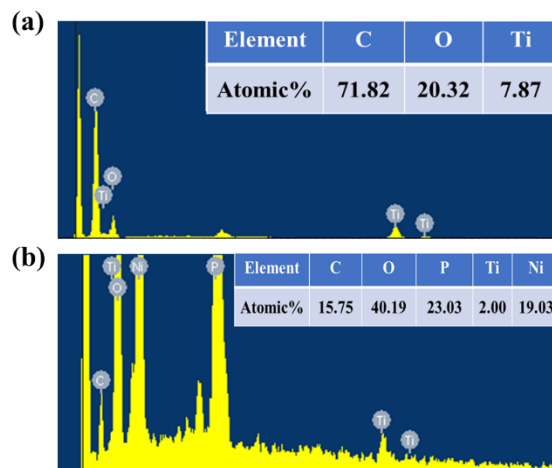

Fig. S2 EDX analysis of (a) TiO<sub>2</sub>/C NFs and (b) Ni<sub>5</sub>P<sub>4</sub>/TiO<sub>2</sub>/C NFs

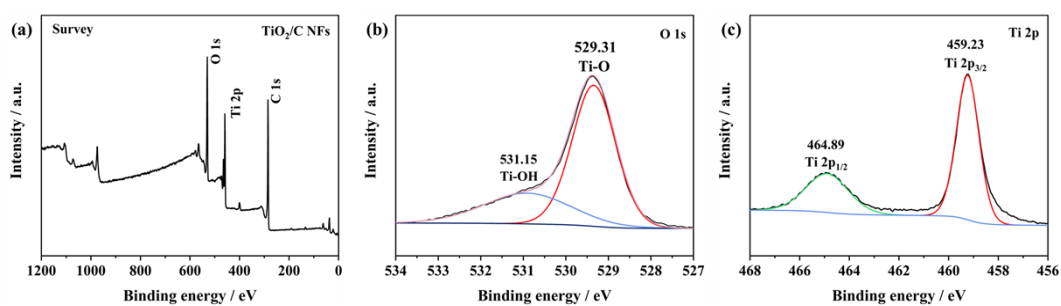

Fig. S3 XPS characterization of TiO<sub>2</sub>/C NFs: (a) survey spectrum, (b) O 1s region and (c) Ti 2p region.

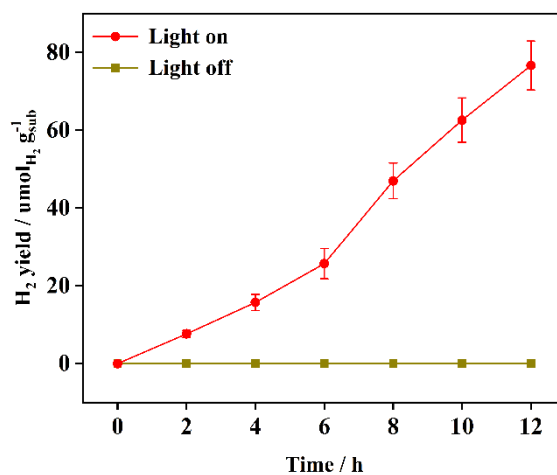

Fig. S4 Photocatalysis of PET microfibers with Ni<sub>5</sub>P<sub>4</sub>/TiO<sub>2</sub>/C NFs under light and no-light conditions.

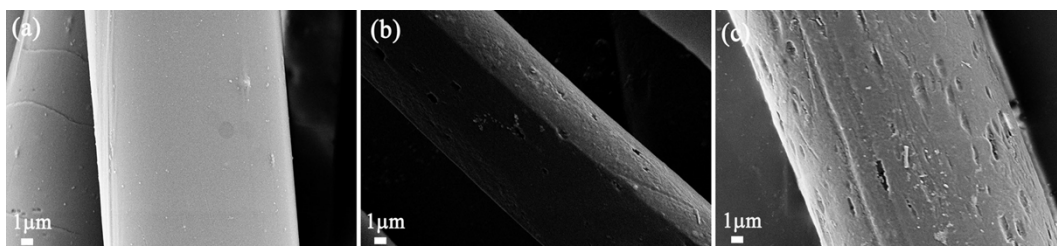

Fig. S5 SEM image of PET microfibers (a) unprocessed original, (b) pre-treated, (c) photocatalyzed

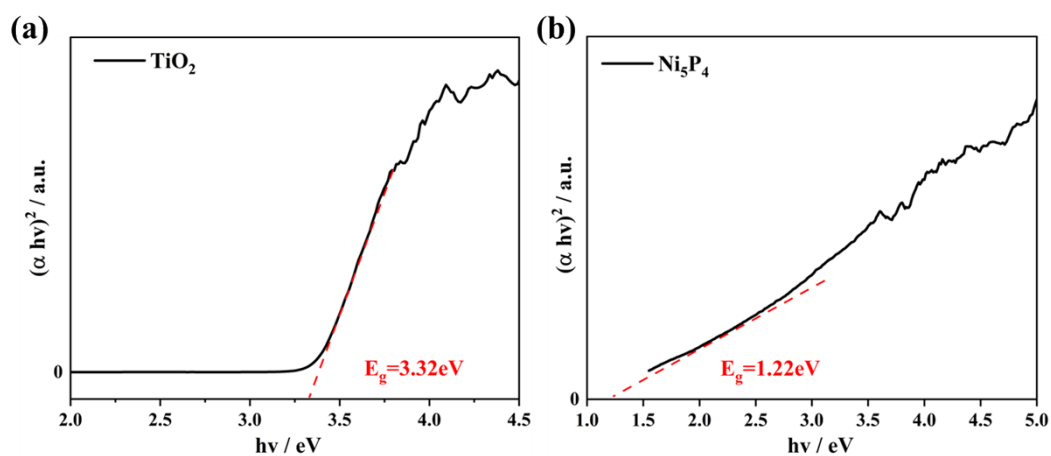

Fig. S6. The corresponding optical bandgaps  $(\alpha hv)^2$  versus  $hv$  curves for (a)  $\text{TiO}_2$  and (b)  $\text{Ni}_5\text{P}_4$ . (Tauc plots of  $(\alpha hv)^2$  against the photon energy ( $hv$ ) according to the formula of  $(\alpha hv)^2 = A(hv - E_g)$  are explored to estimate the band gap energies of  $\text{TiO}_2$  and  $\text{Ni}_5\text{P}_4$ .)

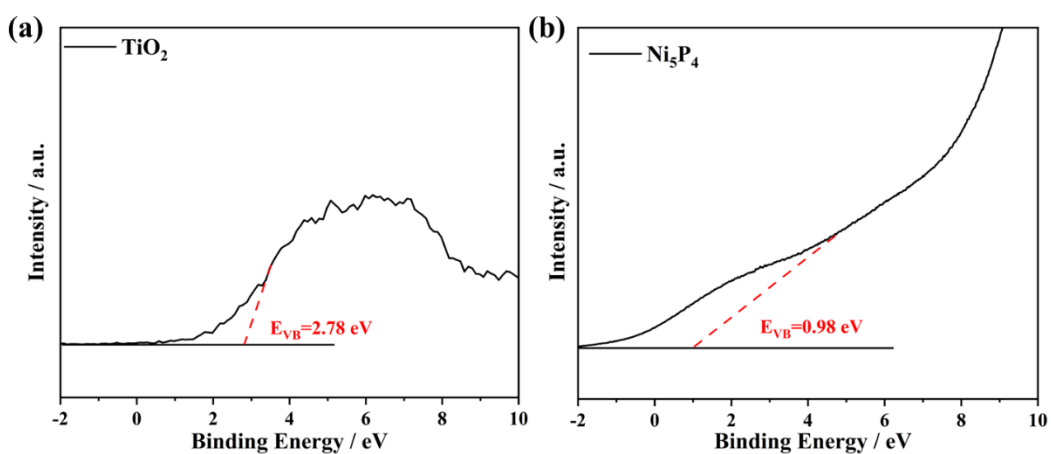

Fig. S7. XPS valence-band spectra of  $\text{TiO}_2$  and  $\text{Ni}_4\text{P}_5$

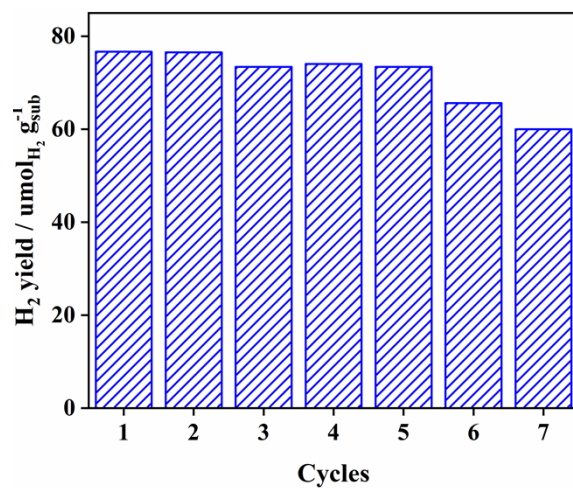

Fig. S8 Cyclic stability of PET microfibers photocatalyzed by Ni<sub>5</sub>P<sub>4</sub>/TiO<sub>2</sub>/C NFs

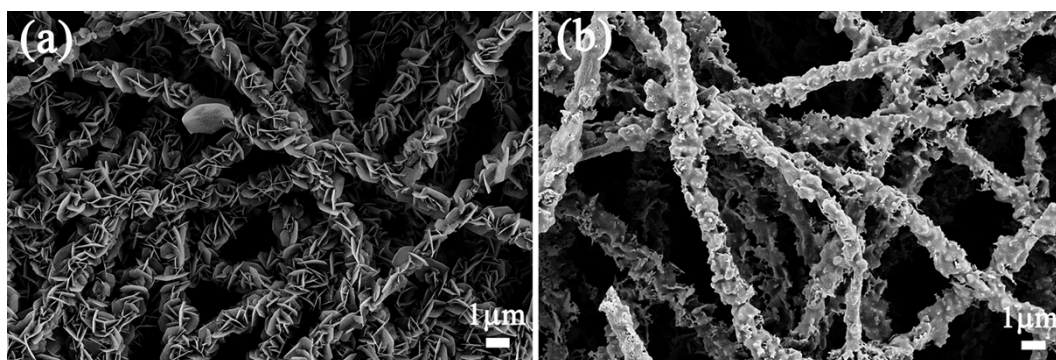

Fig. S9 SEM of Ni<sub>5</sub>P<sub>4</sub>/TiO<sub>2</sub>/C NFs before and after photocatalysis (a) before and (b) after catalysis

Table.S1 Weight loss of Ni<sub>5</sub>P<sub>4</sub>/TiO<sub>2</sub>/C NFs before and after photocatalysis

| Description           | 1     | 2     | 3     | Average value |
|-----------------------|-------|-------|-------|---------------|
| Before catalysis (mg) | 30.00 | 30.00 | 30.00 | 30.00         |
| After catalysis (mg)  | 29.21 | 29.15 | 29.32 | 29.22         |
| Weight loss (%)       | 2.63  | 2.83  | 2.27  | 2.58          |
